# Supplementary material for: Cytokine Profiles as Potential Prognostic and Therapeutic Markers in SARS-CoV-2-Induced ARDS
Source: MDPI journal article supplement (doi:10.3390/jcm11112951), 2022-05-24
Supplement: s1 [file s1]

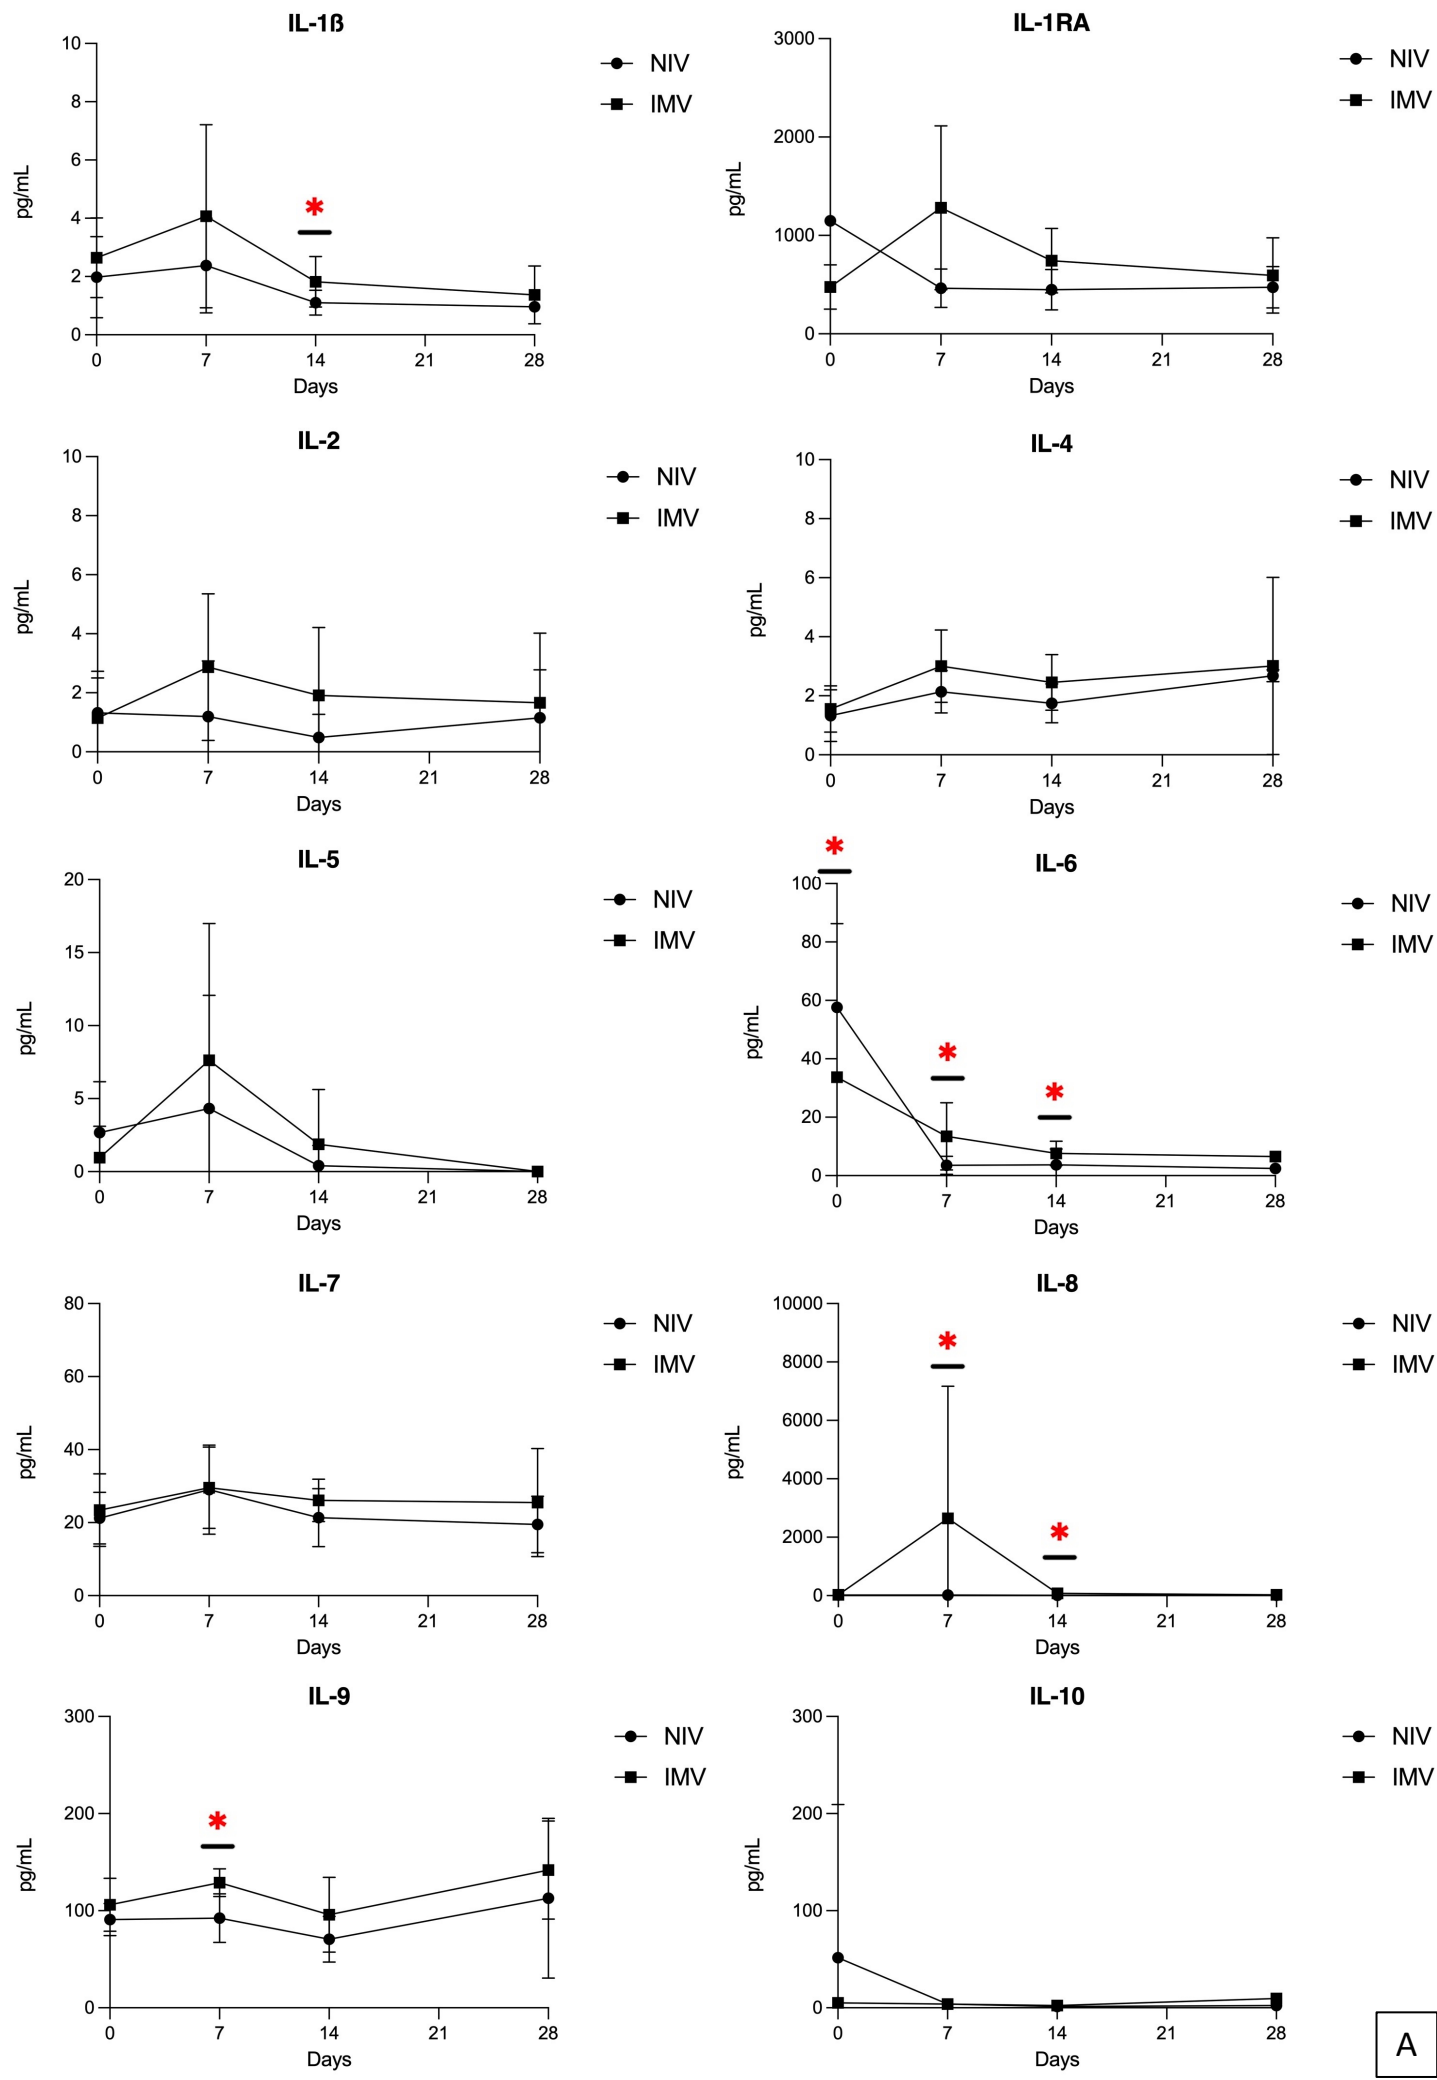

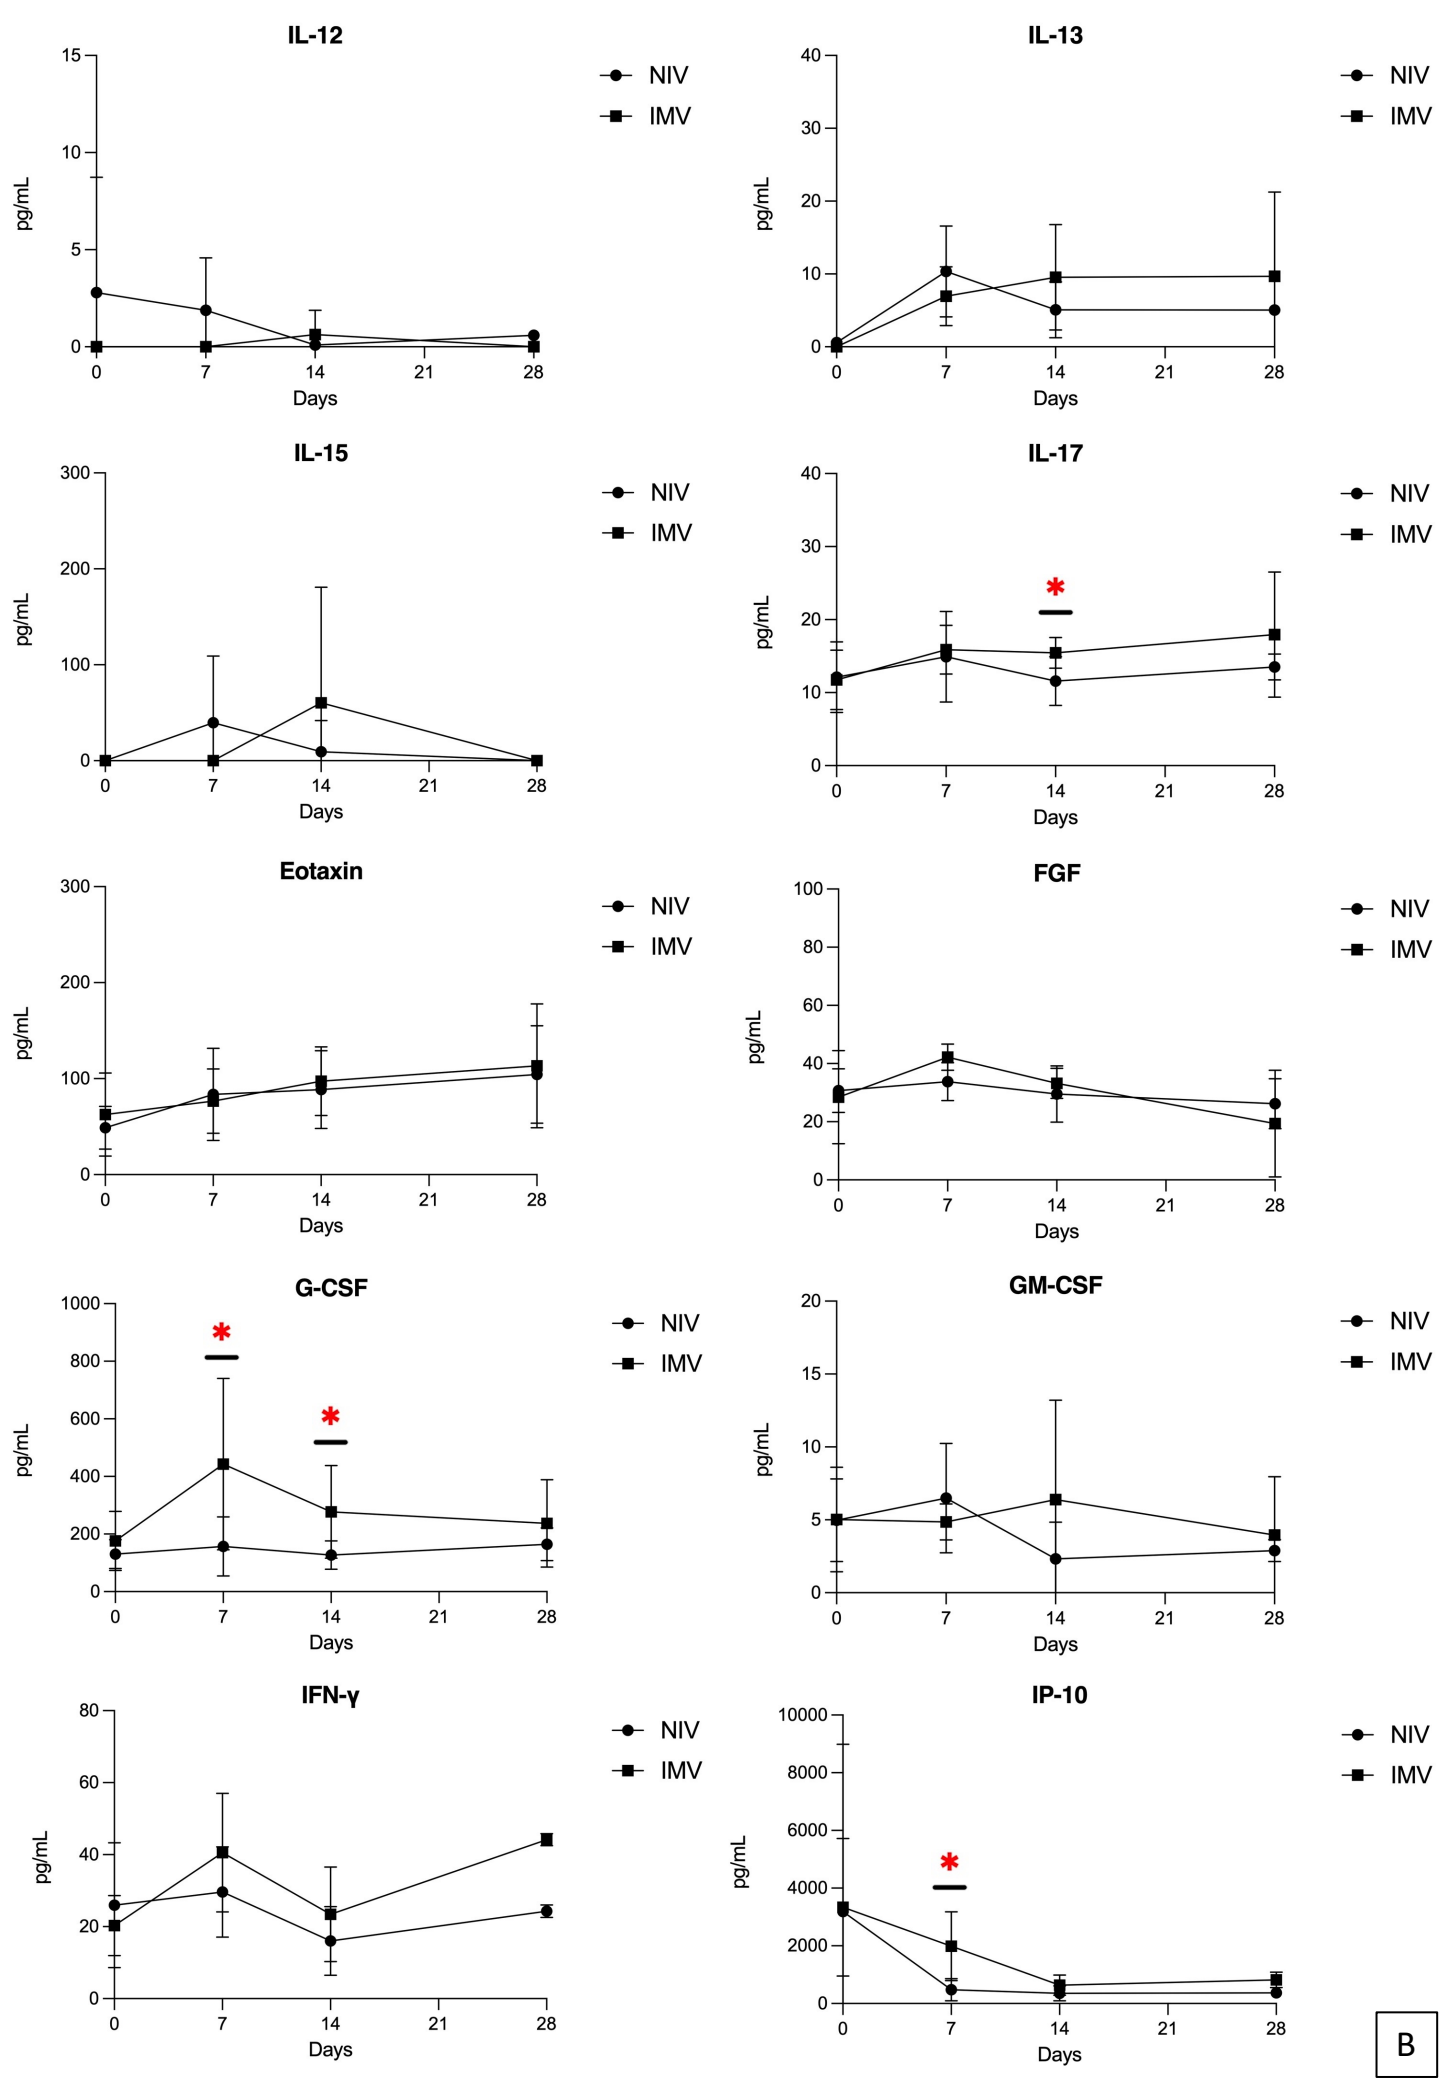

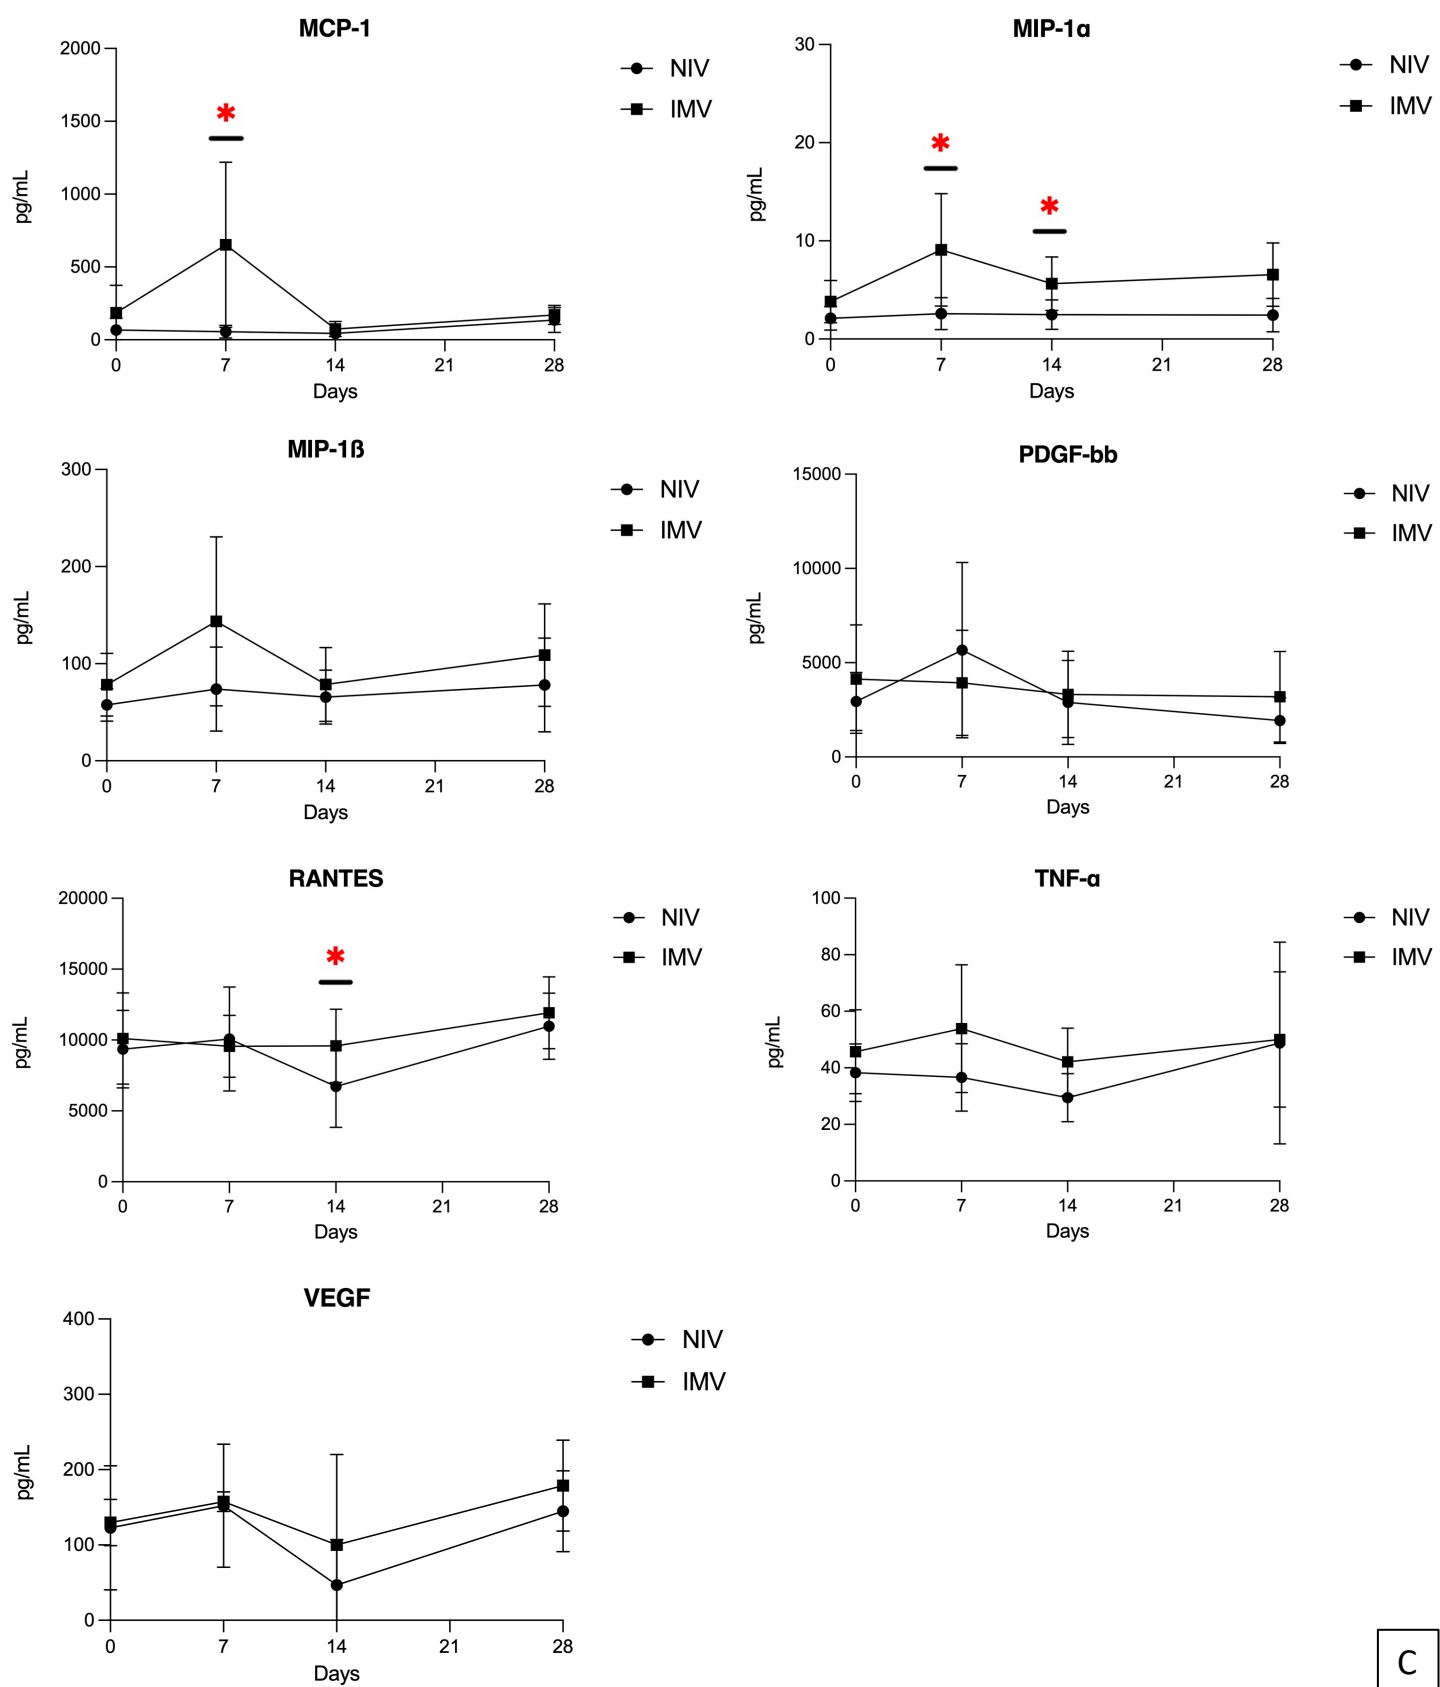

**Figure S1 (A-B-C).** Time-course of single cytokine levels (pg/mL) at days 0, 7, 14, 28. \* indicates statistical significance,  $p$ -value < 0.05.
